# Supplementary material for: Crystal field optimization and fluorescence enhancement of a Mn4+-doped fluoride red phosphor with excellent stability induced by double-site metal ion replacement for warm WLED
Source: Royal Society of Chemistry journal article supplement (doi:10.1039/d3dt01239e), 2023-01-01
Supplement: d3dt01239e1.pdf [file d3dt01239e1.pdf]

## **Electronic Supplementary Information (ESI)**

# **Crystal field optimization and fluorescence enhancement of Mn<sup>4+</sup>-doped fluoride red phosphor with excellent stability induced by double-site metal ion replacement for warm WLED**

Junze Tong<sup>a</sup>, Feng Hong<sup>a,\*</sup>, Long Li<sup>a</sup>, Edwin Yue Bun Pun<sup>b</sup>, Hai Lin<sup>a,b,\*</sup>

<sup>a</sup> School of Textile and Material Engineering, Dalian Polytechnic University, Dalian 116034,  
China

<sup>b</sup> Department of Electrical Engineering and State Key Laboratory of Terahertz and Millimeter  
Waves, City University of Hong Kong, Hong Kong Special Administrative Region, China

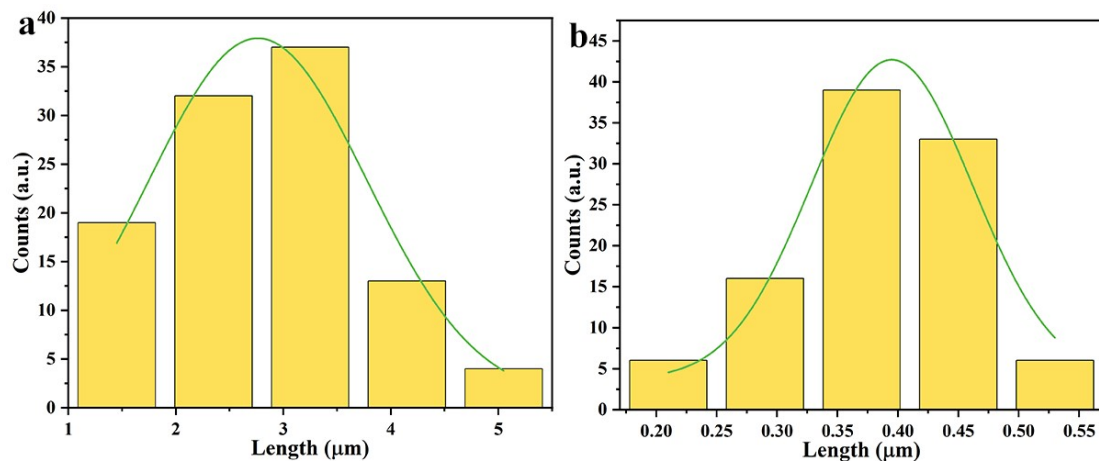

Fig. S1 Histogram of length (a) and diameter (b) of as-prepared BaSiF<sub>6</sub>:Mn<sup>4+</sup> red phosphor.

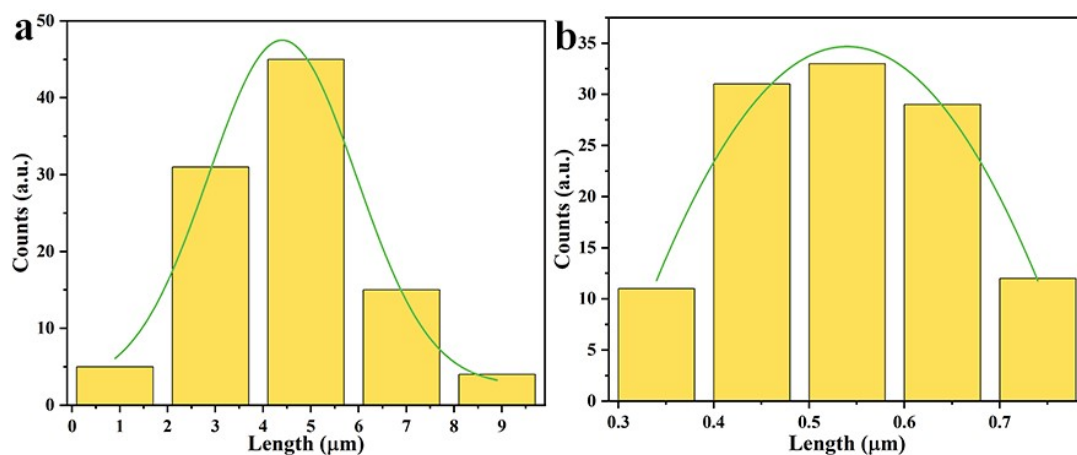

Fig. S2 Histogram of length (a) and diameter (b) of as-prepared BaSi<sub>0.5</sub>Ge<sub>0.5</sub>F<sub>6</sub>:Mn<sup>4+</sup> red phosphor.

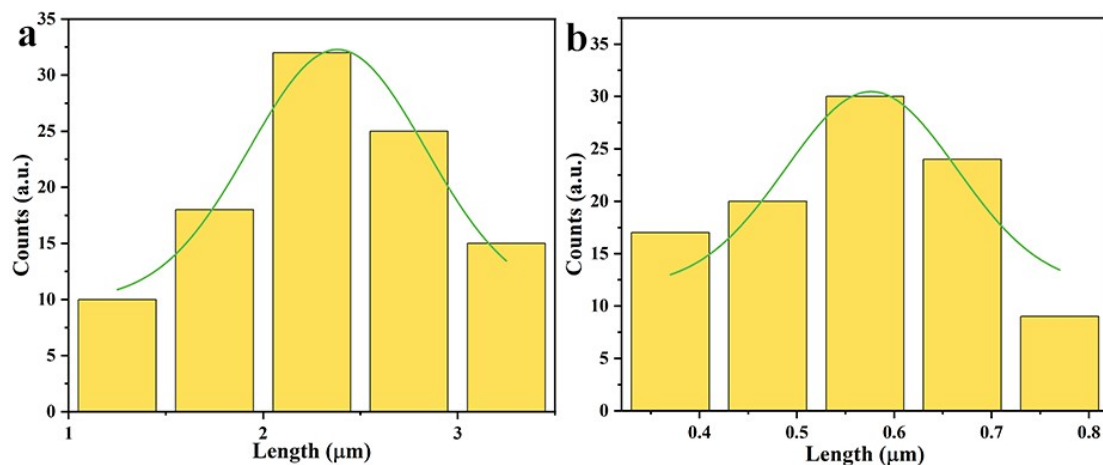

Fig. S3 Histogram of length (a) and diameter (b) of as-prepared K<sub>0.6</sub>Ba<sub>0.7</sub>Si<sub>0.5</sub>Ge<sub>0.5</sub>F<sub>6</sub>:Mn<sup>4+</sup> red phosphor

**Table 1** Spectroscopic parameters and  $\beta_1$  values of  $Mn^{4+}$  ions for as-reported  $Mn^{4+}$ -activated fluorides and oxides phosphor reported by other literature

| Host                                 | $D_q/cm^{-1}$ | $B/cm^{-1}$ | $C/cm^{-1}$ | $\beta_1$ | $E(^2E_g)/cm^{-1}$ | Ref.      |
|--------------------------------------|---------------|-------------|-------------|-----------|--------------------|-----------|
| $Na_2TiF_6$                          | 2100          | 504         | 4052        | 1.037     | 16129              | 1         |
| $K_2XF_7(X = Ta, Nb)$                | 2166          | 511         | 3955        | 1.03      | 15948              | 2         |
| $(NH_4)_2NaAlF_6$                    | 2144          | 531         | 3850        | 1.004     | 15698              | 3         |
| $(NH_4)_2NaGaF_6$                    | 2144          | 531         | 3858        | 1.006     | 15723              | 3         |
| $(NH_4)_2NaInF_6$                    | 2144          | 531         | 3874        | 1.01      | 15772              | 3         |
| $KZnF_3$                             | 2105          | 607         | 3785        | 1.0235    | 15797              | 4         |
| $KGaP_2O_7$                          | 2204          | 782         | 2804        | 0.9385    | 14245              | 5         |
| $SrGd_2Al_2O_7$                      | 2053          | 767         | 2762        | 0.921     | 13793              | 6         |
| $Gd_2ZnTiO_6$                        | 1980          | 639         | 3132        | 0.913     | 14184              | 7         |
| $Li_3Mg_2SbO_6$                      | 2096          | 812         | 2634        | 0.9299    | 15015              | 8         |
| $La(MgTi)_{1/2}O_3$                  | 2053          | 700         | 2959        | 0.915     | 14124              | 9         |
| $Sr_2LaNbO_6$                        | 2101          | 722         | 3001        | 0.9348    | 14409              | 10        |
| $K_{0.6}Ba_{0.7}Si_{0.5}Ge_{0.5}F_6$ | 2173          | 556         | 3795        | 1.004     | 15773              | This work |

## References

- [1] Y. M. Liu, T. M. Wang, Z. R. Tan, J. M. Meng, W. J. Huang, Y. H. Huang, S. Liao, H. X. Zhang, *Ceram. Int.* 2019, **45**, 6243-6249.
- [2] H. Lin, T. Hu, Q. M. Huang, Y. Cheng, B. Wang, J. Xu, J. M. Wang, Y. S. Wang, *Laser Photonics Rev.* 2017,**11**, 1700148.
- [3] H. Wang, X. Y. Liu, F. Hong, Y. K. Dong, Y. N. Li, G. X. Liu, J. X. Wang, D. Li, W. S. Yu, X. T. Dong, *J. Lumin.* 2022, **251**, 119242.
- [4] T. Hu, H. Lin, F. L. Lin, Y. Gao, Y. Cheng, J. Xu, Y.S. Wang, *J. Mater. Chem. C*,2018, **6**, 10845-10854.
- [5] V. Naresh, N. Lee, *J. Lumin.* 2019, **214**, 116565.

- [6] J. L. Xiao, J. C. Zhang, C. Y. Tu, J. S. Liao, H. R. Wen, G. L. Gong, *Opt. Mater.* 2021, **118**, 111219.
- [7] H. Chen, H. Lin, Q. M. Huang, F. Huang, J. Xu, B. Wang, Z. B. Lin, J. C. Zhou, Y. S. Wang, *J. Mater. Chem. C*, 2016, **4**, 2374-2381.
- [8] J. S. Zhong, X. Chen, D. Q. Chen, M. J. Liu, Y. W. Zhu, X. Y. Li, Z. G. Ji, *J. Alloys Compd.* 2019, **773**, 413-422.
- [9] Z. W. Zhou, J. M. Zheng, R. Shi, N. M. Zhang, J. Y. Chen, R. Y. Zhang, H. Suo, E. M. Goldys, C. F. Guo, *ACS Appl. Mater. Interfaces* 2017, **9**, 6177-6185.
- [10] A. J. Fu, A. X. Guan, D. Y. Yu, S. Y. Xia, F. F. Gao, X. S. Zhang, L. Y. Zhou, Y. H. Li, R. G. Li, *Mater. Res. Bull.* 2017, **88**, 258-265.
